# Supplementary material
Source: PubMed Central journal article supplement (PMC5951608)
Supplement: sb8b00018_si_001.pdf [file sb8b00018_si_001.pdf]

## SUPPLEMENTARY FIGURES

**Figure S1:** The alphoid<sup>hybrid</sup> HACs contain both alphoid DNA arrays (Related to Figure 5). **(a)** Representative images of FISH experiments using specific oligonucleotide probes that recognize tetO sequences (red; second panel) and lacO+gal4 sequences (green; third panel) in the indicated cell lines. **(b)** Representative image of a cell containing the alphoid<sup>hybrid</sup> HAC tethered with tetR-mCherry (first panel) and lacI-GFP (second panel).

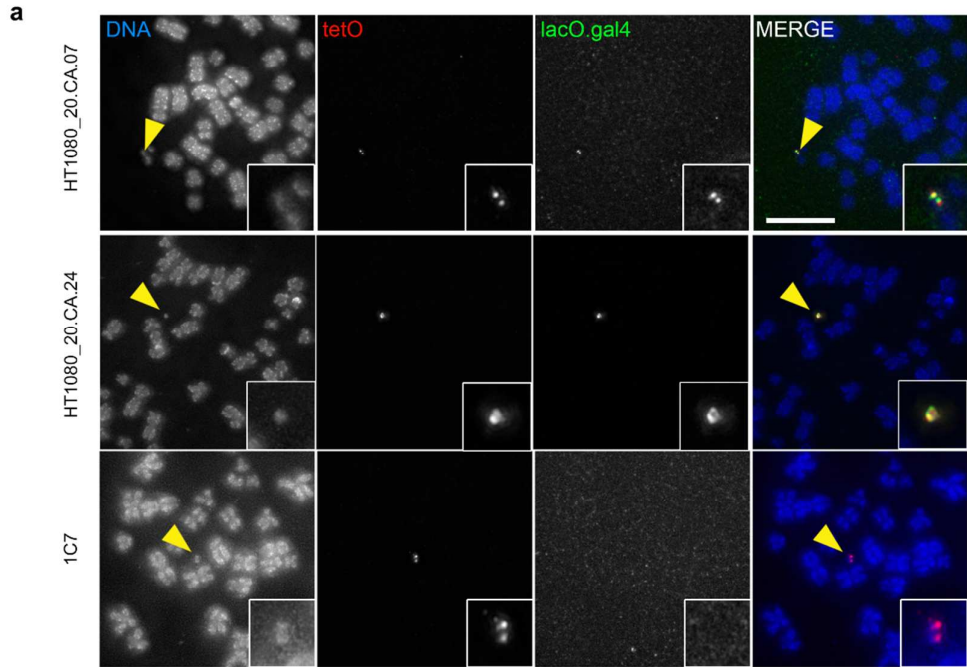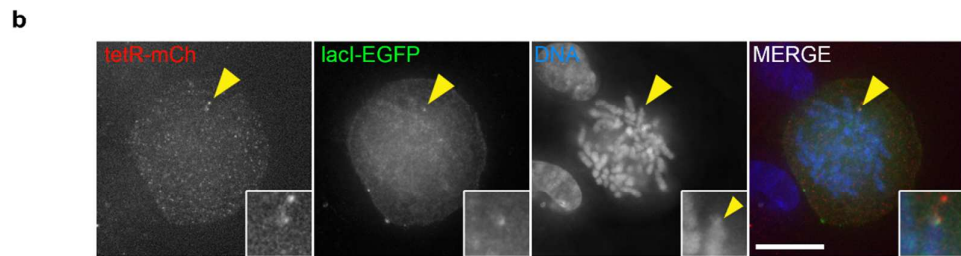

Supplementary Figure 1

**Figure S2:** The alphoid<sup>hybrid</sup> HAC in clone 20.CA.24 is larger than in clone 20.CA.07. (Related to Figure 6). **(a)** Quantification of the alphoid<sup>hybrid</sup> HAC-associated DAPI intensity in metaphase spreads. **(b)** Quantification of the alphoid<sup>hybrid</sup> HAC-associated tetO (green bars) and lacO+gal4 (red bars) fluorescence signals in the indicated cell lines. n=16 metaphases per cell line; Mann-Whitney test <0.0001.

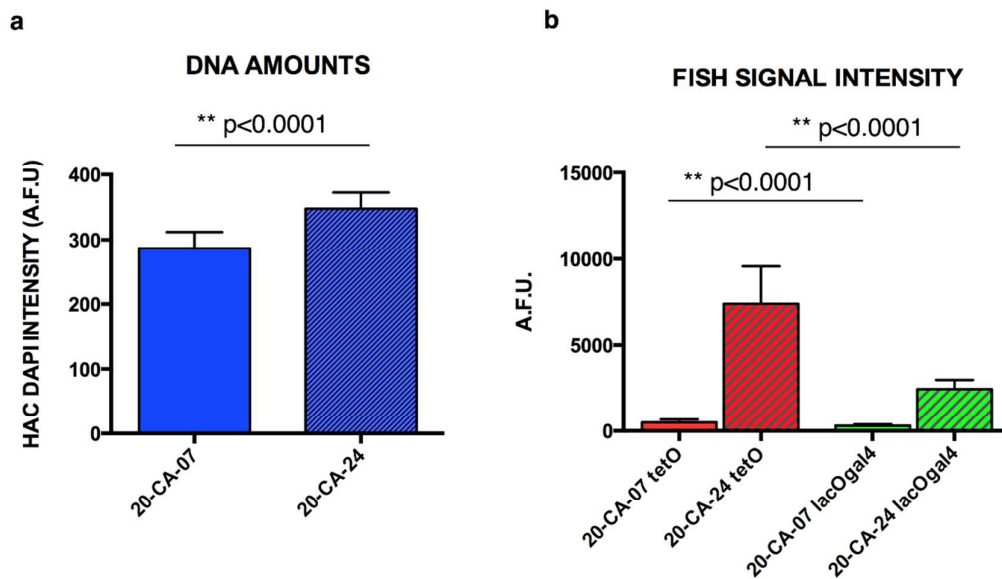

Supplementary Figure 2

**Figure S3:** Structural analysis of the hybrid HAC propagated in clone 20.CA.07. (Related to Figure 6). **(a-b)** Representative FISH images recognizing the tetO and lacO+gal4 domains of the alphoid<sup>hybrid</sup> HAC in a metaphase chromosome spreads **(a)** and in interphase nuclei **(b)**. **(c)** Quantification of the frequency of the indicated distribution of FISH signals in interphase nuclei of 20.CA.07 cells (2 independent FISH experiments). **(d)** Southern blot for the HAC clone 20.CA.07. Genomic DNA was digested with SpeI endonuclease and separated by CHEF gel electrophoresis (range 10-100kb). The transferred membrane was hybridized with radioactively labeled either tetO-specific or lacO+gal4-specific probes. Arrows indicate to the fragments of 95kb and 65kb in size that are specific to both probes.

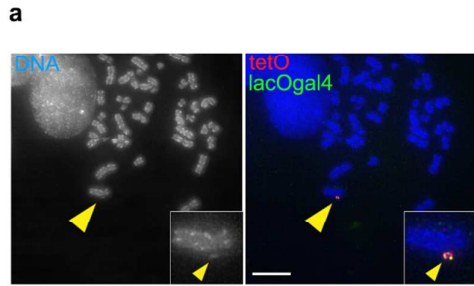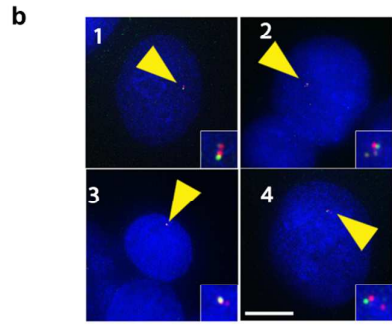

**c** INTERPHASE FISH SIGNAL DISTRIBUTION

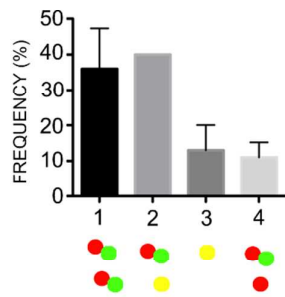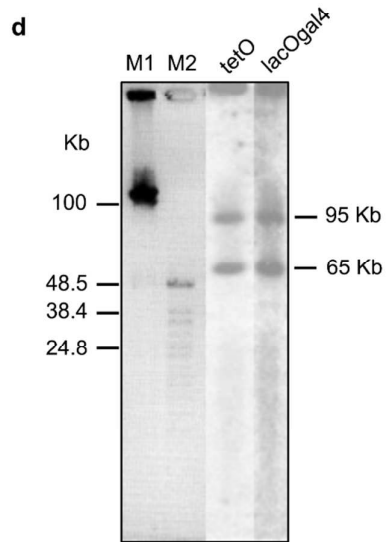

Supplementary Figure 3

**Figure S4:** The aliphoid<sup>hybrid</sup> HAC shows epigenetically distinct centromeric domains (Related to Figure 8). Quantification of fluorescence signals of HAC-associated H3K9me3 (**a**) and H3K9ac (**b**) in clone 20.CA.20-5B10 cells expressing the indicated fusion proteins. Solid bars indicate the medians and error bars represent the standard error of the mean (s.e.m). N= two independent experiments per time point and staining. Asterisks indicate a significant difference (\*\*  $p < 0.001$ ; Mann-Whitney test).

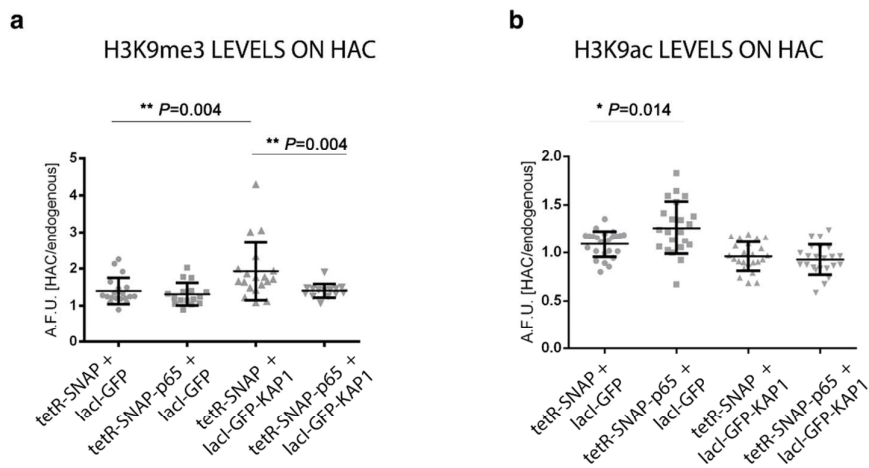

Supplementary figure 4
